# Supplementary material
Source: PubMed Central journal article supplement (PMC4832700)

Supplementary file:  
Figure 1 Flow Chart of Sampling Method

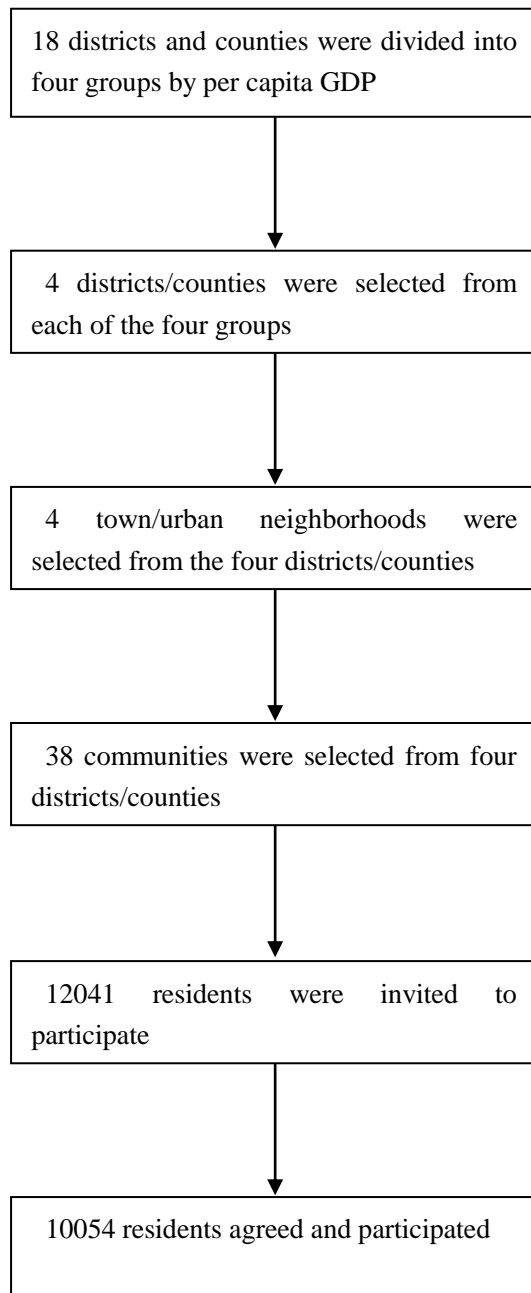

Supplement: supp_heartasia-2013-010440_heartasia-2013-010440supp.pdf [file supp_heartasia-2013-010440_heartasia-2013-010440supp.pdf]
